# Supplementary material for: Detection of <em>Toxoplasma gondii</em> in Sylvatic Rodents in Poland Using Molecular and Serological Methods
Source: Preprints.org preprint supplement (doi:10.20944/preprints202303.0132.v1), 2023-03-07
Supplement: Supplementary file 1 [file supplementary]

## Sheet: Hárok1
Sample	Date	Locality	Date of testing	T. gondii IgG, IgA, IgM	Species
2.	9/2021	Mazury - Urwitalt	2023-01-31	Neg.	Apodemus agrarius
3.	9/2021	Mazury - Urwitalt	2023-01-31	Neg.	Apodemus agrarius
4.	9/2022	Mazury - Urwitalt	2023-01-31	Neg.	Apodemus agrarius
5.	9/2022	Mazury - Urwitalt	2023-01-31	Neg.	Apodemus agrarius
6.	9/2022	Mazury - Urwitalt	2023-01-31	Neg.	Apodemus agrarius
7.	9/2022	Mazury - Urwitalt	2023-01-31	Neg.	Apodemus agrarius
8.	9/2022	Mazury - Urwitalt	2023-01-31	Neg.	Apodemus agrarius
9.	9/2022	Mazury - Urwitalt	2023-01-31	Neg.	Apodemus agrarius
10.	9/2022	Mazury - Urwitalt	2023-01-31	Neg.	Apodemus agrarius
11.	9/2022	Mazury - Urwitalt	2023-01-31	Neg.	Apodemus agrarius
12.	9/2022	Mazury - Urwitalt	2023-01-31	Neg.	Apodemus agrarius
13.	9/2022	Mazury - Urwitalt	2023-01-31	Neg.	Apodemus agrarius
14.	9/2022	Mazury - Urwitalt	2023-01-31	Neg.	Apodemus agrarius
15.	5/2022	Mazury - Urwitalt	2023-01-31	Neg.	Apodemus flavicollis
16.	5/2022	Mazury - Urwitalt	2023-01-31	Neg.	Apodemus flavicollis
17.	5/2022	Mazury - Urwitalt	2023-01-31	Neg.	Apodemus flavicollis
18.	5/2022	Mazury - Urwitalt	2023-01-31	Neg.	Apodemus flavicollis
19.	9/2021	Mazury - Urwitalt	2023-01-31	Positive	Apodemus flavicollis
1.	9/2021	Mazury - Urwitalt	2023-01-30	Neg.	Apodemus flavicollis
2.	9/2021	Mazury - Urwitalt	2023-01-31	Neg.	Apodemus flavicollis
3.	9/2021	Mazury - Urwitalt	2023-01-31	Positive	Apodemus flavicollis
5.	9/2021	Mazury - Urwitalt	2023-01-31	Neg.	Apodemus flavicollis
6.	9/2022	Mazury - Urwitalt	2023-01-31	Neg.	Apodemus flavicollis
7.	9/2022	Mazury - Urwitalt	2023-01-31	Neg.	Apodemus flavicollis
9.	9/2022	Mazury - Urwitalt	2023-01-31	Neg.	Apodemus flavicollis
10.	9/2022	Mazury - Urwitalt	2023-01-31	Neg.	Apodemus flavicollis
11.	9/2022	Mazury - Urwitalt	2023-01-31	Positive	Apodemus flavicollis
14.	9/2022	Mazury - Urwitalt	2023-01-31	Neg.	Apodemus flavicollis
58.	9/2022	Mazury - Urwitalt	2023-01-31	Neg.	Apodemus flavicollis
37.	9/2022	Mazury - Urwitalt	2023-01-31	Neg.	Apodemus flavicollis
36.	9/2022	Mazury - Urwitalt	2023-01-31	Neg.	Apodemus flavicollis
35.	9/2022	Mazury - Urwitalt	2023-01-31	Neg.	Apodemus flavicollis
34.	9/2022	Mazury - Urwitalt	2023-01-31	Neg.	Apodemus flavicollis
94.	9/2022	Mazury - Urwitalt	2023-01-31	Neg.	Apodemus flavicollis
81.	9/2021	Mazury - Urwitalt	2023-01-31	Positive	Microtus agrestis
93.	9/2022	Mazury - Urwitalt	2023-01-31	Neg.	Microtus agrestis
80.	9/2022	Mazury - Urwitalt	2023-01-31	Neg.	Microtus agrestis
33.	9/2022	Mazury - Urwitalt	2023-01-31	Neg.	Microtus agrestis
78.	9/2022	Mazury - Urwitalt	2023-01-31	Neg.	Microtus agrestis
59.	9/2022	Mazury - Urwitalt	2023-01-31	Neg.	Microtus agrestis
60.	9/2021	Mazury - Urwitalt	2023-01-31	Neg.	Microtus arvalis
79.	9/2022	Mazury - Urwitalt	2023-01-31	Neg.	Microtus arvalis
42.	5/2022	Mazury - Urwitalt	2023-01-31	Neg.	Myodes glareolus
43.	5/2022	Mazury - Urwitalt	2023-01-31	Neg.	Myodes glareolus
44.	5/2022	Mazury - Urwitalt	2023-01-31	Neg.	Myodes glareolus
46.	5/2022	Mazury - Urwitalt	2023-01-31	Neg.	Myodes glareolus
47.	5/2022	Mazury - Urwitalt	2023-01-31	Neg.	Myodes glareolus
50.	5/2022	Mazury - Urwitalt	2023-01-31	Neg.	Myodes glareolus
51.	9/2021	Mazury - Urwitalt	2023-01-31	Neg.	Myodes glareolus
52.	9/2021	Mazury - Urwitalt	2023-01-31	Neg.	Myodes glareolus
53.	9/2021	Mazury - Urwitalt	2023-01-30	Neg.	Myodes glareolus
54.	9/2021	Mazury - Urwitalt	2023-01-30	Neg.	Myodes glareolus
55.	9/2021	Mazury - Urwitalt	2023-01-31	Neg.	Myodes glareolus
56.	9/2022	Mazury - Urwitalt	2023-01-31	Neg.	Myodes glareolus
57.	9/2022	Mazury - Urwitalt	2023-01-31	Neg.	Myodes glareolus
58.	9/2022	Mazury - Urwitalt	2023-01-31	Positive	Myodes glareolus
59.
60.
61.
63.
75.
76.
77.
79.
80.
81.
82.
84.
85.
86.
87.
88.
89.
90.
